# Supplementary material
Source: publisher site journal article supplement (https://www.dovepress.com/article/603441)
Supplement: Supplementary file 1 [file 603441%20Revised%20Table%20S1-S6.docx]

**Table S1 The Abbreviations of Pathogens**

| **No.** | **Pathogens** | **Abbreviations** |
| --- | --- | --- |
| 1 | influenza A virus | FLUAV |
| 2 | influenza A/H1-2009 | FLUAV-H1 |
| 3 | influenza A/H3 | FLUAV-H3 |
| 4 | influenza B virus | FLUBV |
| 5 | human parainfluenza virus 1 | HPIV1 |
| 6 | human parainfluenza virus 2 | HPIV2 |
| 7 | human parainfluenza virus 3 | HPIV3 |
| 8 | human parainfluenza virus 4 | HPIV4 |
| 9 | human coronavirus 229E | HCoV_229E |
| 10 | human coronavirus HKU1 | HCoV_HKU1 |
| 11 | human coronavirus NL63 | HCoV_NL63 |
| 12 | human coronavirus OC43 | HCoV_OC43 |
| 13 | human respiratory syncytial virus | HRSV |
| 14 | human metapneumovirus | HMPV |
| 15 | human rhinovirus | HRV |
| 16 | measles virus | MeV |
| 17 | human adenovirus | HAdV |
| 18 | human bocavirus | HBoV |
| 19 | *Mycoplasma pneumoniae* | *M. pneumoniae* |
| 20 | *Chlamydia pneumoniae* | *C. pneumoniae* |
| 21 | *Streptococcus pyogenes (group A Streptococcus)* | *GAS* |
| 22 | *Haemophilus influenzae* | *H. influenzae* |
| 23 | *Klebsiella pneumoniae* | *K. pneumoniae* |
| 24 | *Pseudomonas aeruginosa* | *P. aeruginosa* |
| 25 | *Staphylococcus aureus* | *S. aureus* |
| 26 | *Moraxella catarrhalis* | *M. catarrhalis* |
| 27 | *Escherichia coli* | *E. coli* |
| 28 | *Acinetobacter baumannii* | *A. baumannii* |
| 29 | *Bordetella pertussis* | *B. pertussis* |
| 30 | *Legionella pneumophila* | *L. pneumophila* |
| 31 | *Streptococcus pneumoniae* | *S. pneumoniae* |

**Table S2 Pathogen positive rates in patients of different genders**

| **Pathogen** | **Gender [n (%)]** | | **p-value** | **Pathogen** | **Gender [n (%)]** | | **p-value** |
| --- | --- | --- | --- | --- | --- | --- | --- |
| **Male** | **Female** | **Male** | **Female** |
| **Viral pathogen** | | | | **Bacterial pathogen** | | | |
| FLUAV | 118(27.96%) | 118(26.7%) | 0.7332 | *H. influenzae* | 119(28.2%) | 111(25.11%) | 0.3427 |
| FLUAV-H3 | 83(19.67%) | 91(20.59%) | 0.8009 | *A. baumannii* | 82(19.43%) | 80(18.1%) | 0.6788 |
| FLUBV | 48(11.37%) | 42(9.5%) | 0.4301 | *K. pneumoniae* | 67(15.88%) | 58(13.12%) | 0.292 |
| HAdV | 21(4.98%) | 23(5.2%) | 1 | *E. coli* | 55(13.03%) | 64(14.48%) | 0.6045 |
| HRSV | 10(2.37%) | 8(1.81%) | 0.7357 | *P. aeruginosa* | 52(12.32%) | 50(11.31%) | 0.723 |
| HMPV | 7(1.66%) | 2(0.45%) | 0.1584 | *S. aureus* | 25(5.92%) | 33(7.47%) | 0.4417 |
| HCoV_229E | 2(0.47%) | 6(1.36%) | 0.3173 | *M. catarrhalis* | 17(4.03%) | 19(4.3%) | 0.9774 |
| HRV | 3(0.71%) | 2(0.45%) | 0.9586 | *B. pertussis* | 9(2.13%) | 4(0.9%) | 0.2293 |
| HPIV3 | 2(0.47%) | 2(0.45%) | 1 | *GAS* | 2(0.47%) | 2(0.45%) | 1 |
| HPIV4 | 2(0.47%) | 2(0.45%) | 1 | **Atypical bacteria** | | | |
| FLUAV-H1 | 1(0.24%) | 2(0.45%) | 1 | *M. pneumoniae* | 28(6.64%) | 22(4.98%) | 0.3695 |
| HCoV_HKU1 | 3(0.71%) | 0(0%) | 0.2312 | *C. pneumoniae* | 0(0%) | 1(0.23%) | 1 |
| HBoV | 1(0.24%) | 0(0%) | 0.9815 |  |  |  |  |

Bold text in the table represents category headings.

**Table S3 Different respiratory pathogens positive rate of different age groups**

| **Pathogen** | **Groups [n (%)]** | | | | **χ²** | **p-value** |
| --- | --- | --- | --- | --- | --- | --- |
| **Children**  **(0-18)** | **Young**  **(18-35)** | **Middle**  **(36-60)** | **Elderly**  **(≥61)** |
| **Viral pathogen** |  |  |  |  |  |  |
| **FLUBV** | 4(3.81%) | 65(17.71%) | 17(8.13%) | 4(2.19%) | 40.2916 | **0** |
| **HRSV** | 8(7.62%) | 1(0.27%) | 5(2.39%) | 4(2.19%) | 21.78 | **1.00E-04** |
| **HAdV** | 12(11.43%) | 23(6.27%) | 6(2.87%) | 3(1.64%) | 16.4182 | **9.00E-04** |
| **FLUAV** | 18(17.14%) | 124(33.79%) | 47(22.49%) | 47(25.68%) | 15.9144 | **0.0012** |
| **FLUAV-H3** | 16(15.24%) | 89(24.25%) | 33(15.79%) | 36(19.67%) | 7.9091 | **0.0479** |
| HBoV | 1(0.95%) | 0(0%) | 0(0%) | 0(0%) | 7.2369 | 0.0647 |
| HPIV4 | 2(1.9%) | 0(0%) | 1(0.48%) | 1(0.55%) | 6.4724 | 0.0908 |
| HCoV_HKU1 | 0(0%) | 0(0%) | 1(0.48%) | 2(1.09%) | 4.6894 | 0.196 |
| HMPV | 3(2.86%) | 3(0.82%) | 2(0.96%) | 1(0.55%) | 3.9862 | 0.263 |
| HRV | 1(0.95%) | 1(0.27%) | 1(0.48%) | 2(1.09%) | 1.7304 | 0.6302 |
| FLUAV-H1 | 0(0%) | 2(0.54%) | 1(0.48%) | 0(0%) | 1.5222 | 0.6771 |
| HCoV_229E | 0(0%) | 4(1.09%) | 2(0.96%) | 2(1.09%) | 1.1467 | 0.7658 |
| HPIV3 | 1(0.95%) | 1(0.27%) | 1(0.48%) | 1(0.55%) | 0.8635 | 0.8342 |
| **Bacterial pathogen** |  |  |  |  |  |  |
| ***H. influenzae*** | 51(48.57%) | 110(29.97%) | 47(22.49%) | 22(12.02%) | 49.8046 | **0** |
| ***GAS*** | 3(2.86%) | 0(0%) | 1(0.48%) | 0(0%) | 15.6201 | **0.0014** |
| *P. aeruginosa* | 11(10.48%) | 38(10.35%) | 21(10.05%) | 32(17.49%) | 7.2129 | 0.0654 |
| *S. aureus* | 10(9.52%) | 29(7.9%) | 8(3.83%) | 11(6.01%) | 5.0754 | 0.1664 |
| *M. catarrhalis* | 8(7.62%) | 16(4.36%) | 8(3.83%) | 4(2.19%) | 5.0268 | 0.1698 |
| *A. baumannii* | 17(16.19%) | 66(17.98%) | 36(17.22%) | 43(23.5%) | 3.6193 | 0.3056 |
| *K. pneumoniae* | 14(13.33%) | 54(14.71%) | 25(11.96%) | 32(17.49%) | 2.5354 | 0.4689 |
| *B. pertussis* | 1(0.95%) | 6(1.63%) | 5(2.39%) | 1(0.55%) | 2.5031 | 0.4747 |
| *E. coli:* | 11(10.48%) | 51(13.9%) | 30(14.35%) | 27(14.75%) | 1.1734 | 0.7594 |
| **Atypical bacteria** | | | | | | |
| ***M. pneumoniae*** | 16(15.24%) | 12(3.27%) | 19(9.09%) | 3(1.64%) | 31.4262 | **0** |
| *C. pneumoniae* | 0(0%) | 0(0%) | 1(0.48%) | 0(0%) | 3.1376 | 0.3709 |
| Bold text in the table denotes P < 0.05, indicating statistical significance. | | | | | | |

**Table S4 Comparison of respiratory pathogen positivity rates between Outpatient/emergency Department (OPED) and hospital inpatients**

| **Pathogen** | **OPED** | **Inpatient** | **χ²** | **p-value** |
| --- | --- | --- | --- | --- |
| **Viral pathogen** |  |  |  |  |
| FLUBV | **86(14.33%)** | 4(1.52%) | 30.9213 | **0** |
| FLUAV | **188(31.33%)** | 48(18.18%) | 15.3161 | **0.0001** |
| FLUAV-H3 | **141(23.5%)** | 33(12.5%) | 13.1174 | **0.0003** |
| HAdV | **40(6.67%)** | 4(1.52%) | 9.0287 | **0.0027** |
| HMPV | 9(1.5%) | 0(0%) | 2.6788 | 0.1017 |
| HRSV | 9(1.5%) | 9(3.41%) | 2.4065 | 0.1208 |
| HPIV4 | 1(0.17%) | 3(1.14%) | 1.9326 | 0.1645 |
| HCoV_HKU1 | 1(0.17%) | 2(0.76%) | 0.5364 | 0.4639 |
| HCoV_229E | 7(1.17%) | 1(0.38%) | 0.5304 | 0.4665 |
| HBoV | 0(0%) | 1(0.38%) | 0.1784 | 0.6728 |
| HRV | 4(0.67%) | 1(0.38%) | 0.0007 | 0.9784 |
| HPIV3 | 3(0.5%) | 1(0.38%) | 0 | 1 |
| FLUAV-H1 | 2(0.33%) | 1(0.38%) | 0 | 1 |
| **Bacterial pathogen** |  |  |  |  |
| ***H. influenzae*** | **191(31.83%)** | 39(14.77%) | 26.4511 | **0** |
| ***A. baumannii*** | 91(15.17%) | **71(26.89%)** | 15.7897 | **0.0001** |
| ***P. aeruginosa*** | 54(9%) | **48(18.18%)** | 13.9759 | **0.0002** |
| *S. aureus* | 46(7.67%) | 12(4.55%) | 2.3754 | 0.1233 |
| *GAS* | 4(0.67%) | 0(0%) | 0.6174 | 0.432 |
| *M. catarrhalis* | 27(4.5%) | 9(3.41%) | 0.3074 | 0.5793 |
| *K. pneumoniae* | 84(14%) | 41(15.53%) | 0.2343 | 0.6283 |
| *E. coli* | 84(14%) | 35(13.26%) | 0.0341 | 0.8536 |
| *B. pertussis* | 9(1.5%) | 4(1.52%) | 0 | 1 |
| Atypical bacteria |  |  |  |  |
| *M. pneumoniae* | 29(4.83%) | 21(7.95%) | 2.7284 | 0.0986 |
| *C. pneumoniae* | 0(0%) | 1(0.38%) | 0.1784 | 0.6728 |
| Bold text in the table denotes P < 0.05, indicating statistical significance. | | | | |

**Table S5 Trend of the positive specimens for 13 viruses from week 41 to week 52 of the 2023 [n(%)]**

| **Week** | **Positive rate** | **FLUAV** | **FLUBV** | **HAdV** | **HRSV** | **HMPV** | **HCoV_229E** | **HRV** | **HPIV4** | **HPIV3** | **FLUAV-H1** | **HCoV_HKU1** | **HBoV** | **FLUAV-H3** |
| --- | --- | --- | --- | --- | --- | --- | --- | --- | --- | --- | --- | --- | --- | --- |
| 2023.10.09 - 2023.10.15 | 10/15(66.67%) | 0(0%) | 0(0%) | 0(0%) | 0(0%) | 0(0%) | 1(6.67%) | 0(0%) | 0(0%) | 1(6.67%) | 0(0%) | 0(0%) | 0(0%) | 0(0%) |
| 2023.10.16 - 2023.10.22 | 17/25(68%) | 1(4%) | 0(0%) | 0(0%) | 0(0%) | 0(0%) | 0(0%) | 0(0%) | 0(0%) | 0(0%) | 0(0%) | 0(0%) | 0(0%) | 1(4%) |
| 2023.10.23 - 2023.10.29 | 24/38(63.16%) | 0(0%) | 0(0%) | 1(2.63%) | 3(7.89%) | 0(0%) | 1(2.63%) | 0(0%) | 0(0%) | 0(0%) | 0(0%) | 0(0%) | 0(0%) | 0(0%) |
| 2023.10.30 - 2023.11.05 | 32/41(78.05%) | 5(12.2%) | 0(0%) | 1(2.44%) | 2(4.88%) | 1(2.44%) | 1(2.44%) | 0(0%) | 1(2.44%) | 0(0%) | 0(0%) | 0(0%) | 1(2.44%) | 2(4.88%) |
| 2023.11.06 - 2023.11.12 | 24/41(58.54%) | 3(7.32%) | 1(2.44%) | 4(9.76%) | 1(2.44%) | 0(0%) | 1(2.44%) | 0(0%) | 0(0%) | 0(0%) | 0(0%) | 0(0%) | 0(0%) | 2(4.88%) |
| 2023.11.13 - 2023.11.19 | 23/36(63.89%) | 8(22.22%) | 0(0%) | 0(0%) | 0(0%) | 0(0%) | 0(0%) | 0(0%) | 2(5.56%) | 1(2.78%) | 0(0%) | 0(0%) | 0(0%) | 5(13.89%) |
| 2023.11.20 - 2023.11.26 | 27/46(58.7%) | 8(17.39%) | 1(2.17%) | 1(2.17%) | 1(2.17%) | 1(2.17%) | 1(2.17%) | 0(0%) | 1(2.17%) | 0(0%) | 0(0%) | 1(2.17%) | 0(0%) | 2(4.35%) |
| 2023.11.27 - 2023.12.03 | 10/14(71.43%) | 2(14.29%) | 0(0%) | 1(7.14%) | 1(7.14%) | 0(0%) | 0(0%) | 2(14.29%) | 0(0%) | 0(0%) | 0(0%) | 1(7.14%) | 0(0%) | 2(14.29%) |
| 2023.12.04 - 2023.12.10 | 138/170(81.18%) | 49(28.82%) | 5(2.94%) | 15(8.82%) | 5(2.94%) | 3(1.76%) | 1(0.59%) | 2(1.18%) | 0(0%) | 1(0.59%) | 1(0.59%) | 1(0.59%) | 0(0%) | 20(11.76%) |
| 2023.12.11 - 2023.12.17 | 145/169(85.8%) | 69(40.83%) | 20(11.83%) | 9(5.33%) | 3(1.78%) | 1(0.59%) | 2(1.18%) | 0(0%) | 0(0%) | 1(0.59%) | 1(0.59%) | 0(0%) | 0(0%) | 64(37.87%) |
| 2023.12.18 - 2023.12.24 | 84/101(83.17%) | 33(32.67%) | 11(10.89%) | 6(5.94%) | 1(0.99%) | 2(1.98%) | 0(0%) | 1(0.99%) | 0(0%) | 0(0%) | 0(0%) | 0(0%) | 0(0%) | 30(29.7%) |
| 2023.12.25 - 2023.12.31 | 154/168(91.67%) | 49(29.17%) | 52(30.95%) | 6(3.57%) | 1(0.6%) | 1(0.6%) | 0(0%) | 0(0%) | 0(0%) | 0(0%) | 1(0.6%) | 0(0%) | 0(0%) | 46(27.38%) |
| χ2 |  | 65.5705 | 112.2885 | 13.7985 | 14.3695 | 5.5096 | 12.9698 | 50.4401 | 30.1033 | 19.0368 | 2.1199 | 25.6154 | 20.0964 | 89.2632 |
| P value |  | **0** | **0** | 0.2443 | 0.2132 | 0.904 | 0.2953 | **0** | **0.0015** | 0.0604 | 0.998 | **0.0074** | **0.044** | **0** |

Bold text in the table denotes P < 0.05, indicating statistical significance.

**Table S6 Trend of the positive specimens for 11 Bacteria & Atypical pathogens from week 41 to week 52 of the 2023［n(％)］**

| **Weeks** | **Positive rate** | ***H. influenzae*** | ***A. baumannii*** | ***K. pneumoniae*** | ***E. coli*** | ***P. aeruginosa*** | ***S. aureus*** | ***M. catarrhalis*** | ***B. pertussis*** | **GAS** | ***M. pneumoniae*** | ***C. pneumoniae*** |
| --- | --- | --- | --- | --- | --- | --- | --- | --- | --- | --- | --- | --- |
| 2023.10.09 - 2023.10.15 | 10/15(66.67%) | 5(33.33%) | 0(0%) | 2(13.33%) | 1(6.67%) | 1(6.67%) | 0(0%) | 0(0%) | 0(0%) | 0(0%) | 3(20%) | 0(0%) |
| 2023.10.16 - 2023.10.22 | 17/25(68%) | 9(36%) | 0(0%) | 7(28%) | 1(4%) | 2(8%) | 0(0%) | 2(8%) | 0(0%) | 0(0%) | 3(12%) | 1(4%) |
| 2023.10.23 - 2023.10.29 | 24/38(63.16%) | 6(15.79%) | 3(7.89%) | 10(26.32%) | 6(15.79%) | 8(21.05%) | 1(2.63%) | 0(0%) | 1(2.63%) | 0(0%) | 1(2.63%) | 0(0%) |
| 2023.10.30 - 2023.11.05 | 32/41(78.05%) | 11(26.83%) | 11(26.83%) | 3(7.32%) | 10(24.39%) | 9(21.95%) | 1(2.44%) | 3(7.32%) | 1(2.44%) | 0(0%) | 4(9.76%) | 0(0%) |
| 2023.11.06 - 2023.11.12 | 24/41(58.54%) | 8(19.51%) | 3(7.32%) | 5(12.2%) | 6(14.63%) | 2(4.88%) | 4(9.76%) | 1(2.44%) | 0(0%) | 0(0%) | 3(7.32%) | 0(0%) |
| 2023.11.13 - 2023.11.19 | 23/36(63.89%) | 7(19.44%) | 4(11.11%) | 1(2.78%) | 2(5.56%) | 4(11.11%) | 2(5.56%) | 2(5.56%) | 0(0%) | 0(0%) | 5(13.89%) | 0(0%) |
| 2023.11.20 - 2023.11.26 | 27/46(58.7%) | 11(23.91%) | 0(0%) | 1(2.17%) | 3(6.52%) | 2(4.35%) | 1(2.17%) | 3(6.52%) | 0(0%) | 0(0%) | 3(6.52%) | 0(0%) |
| 2023.11.27 - 2023.12.03 | 10/14(71.43%) | 3(21.43%) | 1(7.14%) | 1(7.14%) | 4(28.57%) | 1(7.14%) | 0(0%) | 0(0%) | 0(0%) | 0(0%) | 1(7.14%) | 0(0%) |
| 2023.12.04 - 2023.12.10 | 138/170(81.18%) | 47(27.65%) | 13(7.65%) | 26(15.29%) | 34(20%) | 13(7.65%) | 2(1.18%) | 9(5.29%) | 0(0%) | 0(0%) | 9(5.29%) | 0(0%) |
| 2023.12.11 - 2023.12.17 | 145/169(85.8%) | 49(28.99%) | 48(28.4%) | 28(16.57%) | 18(10.65%) | 18(10.65%) | 19(11.24%) | 5(2.96%) | 1(0.59%) | 1(0.59%) | 10(5.92%) | 0(0%) |
| 2023.12.18 - 2023.12.24 | 84/101(83.17%) | 19(18.81%) | 35(34.65%) | 12(11.88%) | 12(11.88%) | 19(18.81%) | 8(7.92%) | 4(3.96%) | 3(2.97%) | 2(1.98%) | 8(7.92%) | 0(0%) |
| 2023.12.25 - 2023.12.31 | 154/168(91.67%) | 55(32.74%) | 44(26.19%) | 29(17.26%) | 22(13.1%) | 23(13.69%) | 20(11.9%) | 7(4.17%) | 7(4.17%) | 1(0.6%) | 0(0%) | 0(0%) |
| χ2 |  | 13.0809 | 77.6417 | 22.3944 | 20.6678 | 20.9334 | 29.6139 | 7.1411 | 16.3157 | 7.1514 | 25.0531 | 33.5989 |
| P value |  | 0.2881 | **0** | **0.0215** | **0.037** | **0.0341** | **0.0018** | 0.7875 | 0.1298 | 0.7867 | 0.009 | **4.00E-04** |

Bold text in the table denotes P < 0.05, indicating statistical significance.
